# Supplementary material for: A facile hydrothermal method to synthesize Sb2S3/Sb4O5Cl2 composites with three-dimensional spherical structures
Source: Royal Society of Chemistry journal article supplement (doi:10.1039/c5ra09007e), 2015-01-01
Supplement: c5ra09007e1.pdf [file c5ra09007e1.pdf]

## Supporting Information

### **A facile hydrothermal method to synthesize $\text{Sb}_2\text{S}_3/\text{Sb}_4\text{O}_5\text{Cl}_2$ composite with three-dimensional spherical structure**

Qian Jiang <sup>a, b</sup>, Xingzhong Yuan <sup>a, b \*</sup>, Hou Wang <sup>a, b</sup>, Xiaohong Chen <sup>c</sup>, Shansi Gu <sup>a, b</sup>,

Yang Liu <sup>a, b</sup>, Zhibin Wu <sup>a, b</sup>, Guangming Zeng <sup>a, b</sup>

<sup>a</sup> College of Environmental Science and Engineering, Hunan University, Changsha 410082, PR China

<sup>b</sup> Key Laboratory of Environment Biology and Pollution Control, Hunan University, Ministry of Education, Changsha 410082, PR China

<sup>c</sup> Collaborative Innovation Center of Resource-Conserving & Environment-Friendly Society and Ecological Civilization, Changsha 410083, PR China

---

\* Corresponding author at: College of Environmental Science and Engineering, Hunan University, Changsha 410082, PR China. Tel.: +86 731 88821413; fax: +86 731 88823701.  
E-mail address: [yxz@hnu.edu.cn](mailto:yxz@hnu.edu.cn) (X.Z. Yuan)

## Experimental Section

**Preparation:** All the reactants and solvents were of analytical grade and used without further purification. To synthesize  $\text{Sb}_2\text{S}_3/\text{Sb}_4\text{O}_5\text{Cl}_2$ , some procedures were carried out: primarily, 2.282 g  $\text{SbCl}_3$  was dissolved into 20.0 mL  $\text{HCl}$  (6 mol/L) solution to form a homogeneous mixture solution. Subsequently, the mixture solution was added into 50.0 ml  $\text{NaOH}$  (2 mol/L) solution and stirring for 30 min at room temperature. Different mass of  $\text{Na}_2\text{S}$  in 15 mL distilled water was added dropwise into the previous solution under stirring for 10 min at room temperature. Next, the resulting mixture was transferred into 100 mL Teflon-lined steel autoclaves, maintained at 100 °C for 12 h and followed by cooling naturally to room temperature. Finally, the products were filtered, washed several times by water and then dried under vacuum at 60 °C. A series of  $\text{Sb}_2\text{S}_3/\text{Sb}_4\text{O}_5\text{Cl}_2$  composites were prepared by changing the amount of  $\text{Na}_2\text{S}$ . For comparison, pure  $\text{Sb}_4\text{O}_5\text{Cl}_2$  was prepared without  $\text{Na}_2\text{S}$  under the same conditions.

**Characterization:** The X-ray diffraction (XRD) patterns were recorded on Bruker AXS D8 Advance diffractometer using Cu-K $\alpha$  source ( $\lambda = 1.541 \text{ \AA}$ ) with the range of the diffraction angle of ( $2\theta$ ) 15–75°. The surface elemental composition analyses were conducted based on the X-ray Photoelectron Spectroscopy spectra (XPS) (Thermo Fisher Scientific, UK). The morphology of the samples was studied by a field emission scanning electron microscopy (FESEM) (JSM-7001F, Japan) and electron microscopy TM3000. High-resolution transmission electron microscopy (HRTEM) images were obtained by using a Hitachi H 600 electron microscope (Japan) with an accelerating voltage of 100 kV. Ultraviolet-visible (UV-vis) detection was carried out on a Varian Cary 300 spectrometer outfitted with an integrating sphere.

**Photocatalytic Activity Measurements:** The photocatalytic activity of the as-prepared samples was evaluated by photodegradation of MO aqueous solution under visible light. The visible-light source used in the measurements was a 500 W Xe lamp (Beijing China Education Au-light Co. Ltd) irradiation with a 420 nm cut-off filter. Typically, 100 mg powdered samples were dispersed into 100 mL of 15 mg/L MO solution. In order to attain adsorption-desorption equilibrium, the suspension was stirred for 1 h in the dark prior to irradiation. At given time intervals, 4 mL of the mixture was withdrawn from the reaction system and centrifuged at 9000 rpm for 5 min to remove the suspended catalyst particles. The residual MO concentration was measured using a UV-vis spectrophotometer (UV-2250, SHIMADZU Corporation, Japan) at the wavelength of 463 nm.

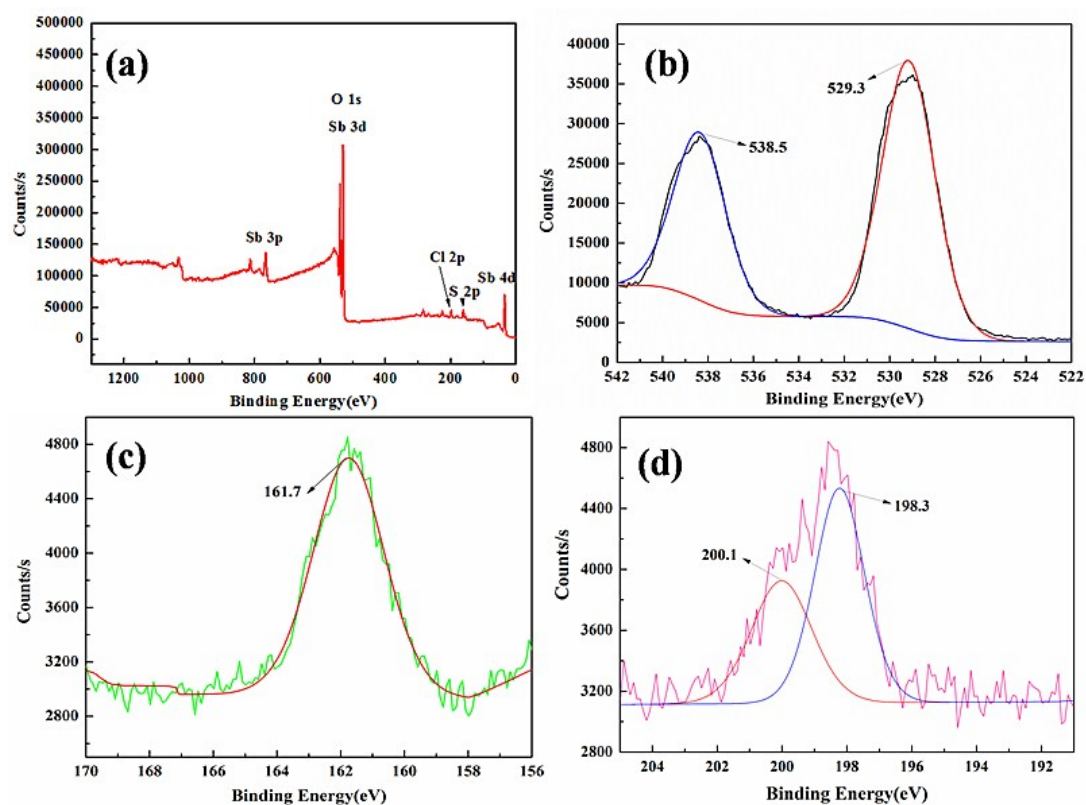

**Fig.S1.** XPS spectra of C2: (a) survey spectrum, (b) Sb 3d, (c) S 2p, (d) Cl 2p.

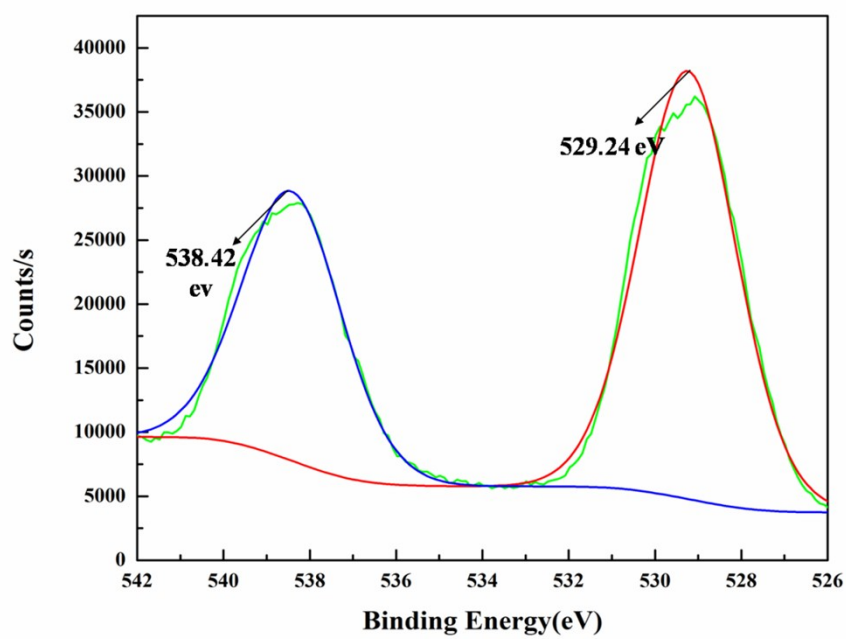

**Fig.S2.** XPS spectra of C2: O 1s.

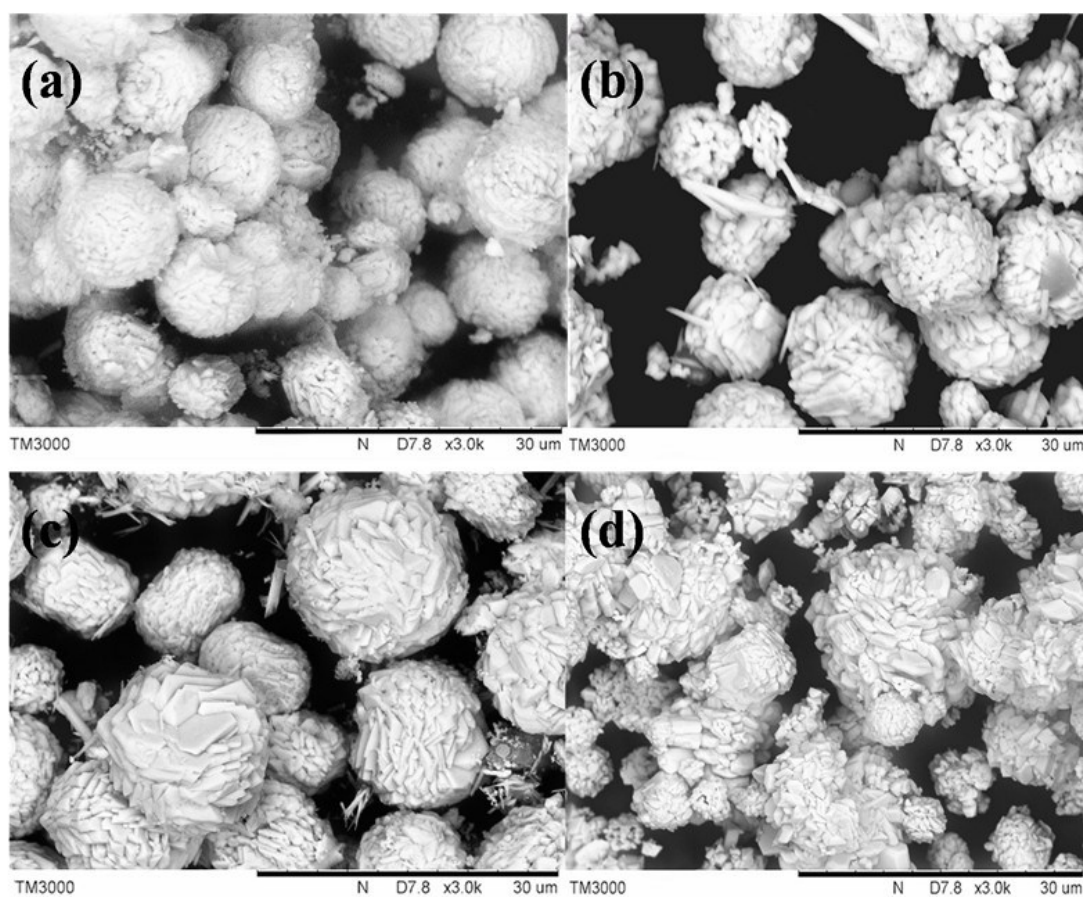

**Fig.S3.** SEM images of (a) C1, (b) C2, (c) C3 and (d)  $\text{Sb}_4\text{O}_5\text{Cl}_2$ ;

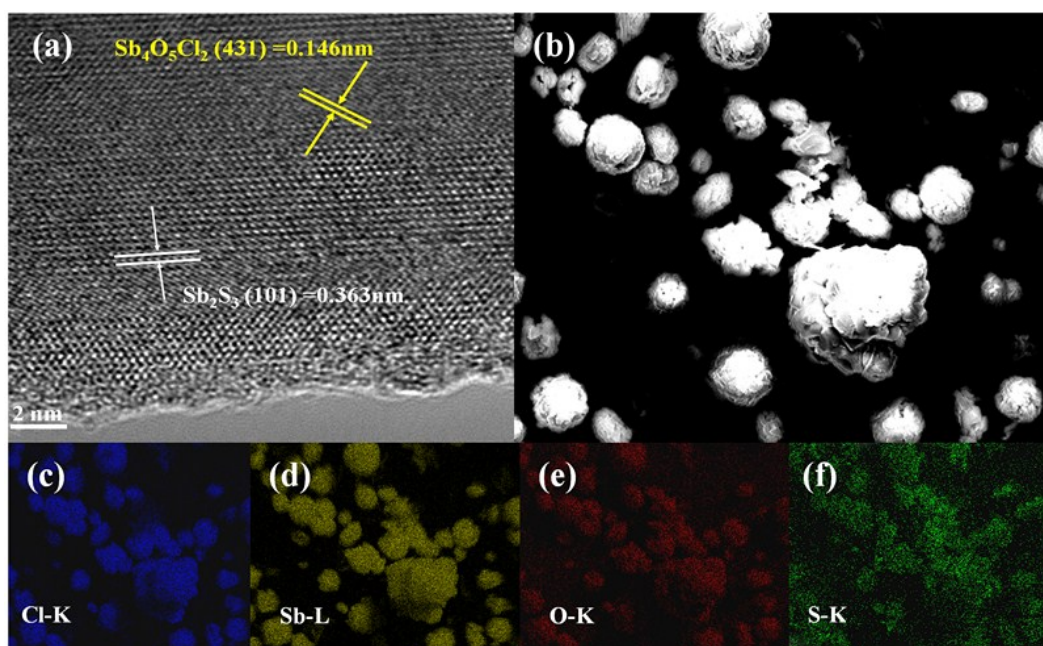

**Fig.S4.** (a) HRTEM image of C2, (b-f) Elemental mapping images of C2.

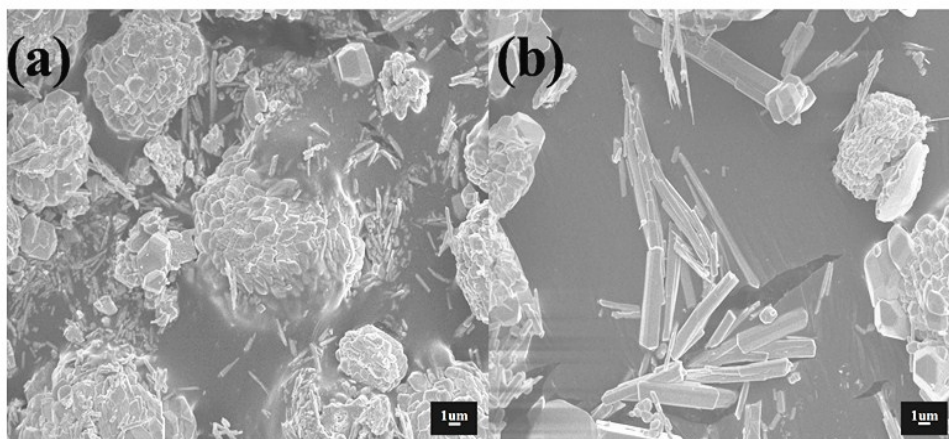

**Fig.S5.** SEM images of the as-synthesized samples with different reaction temperature: (a) 150°C; (b) 200°C.



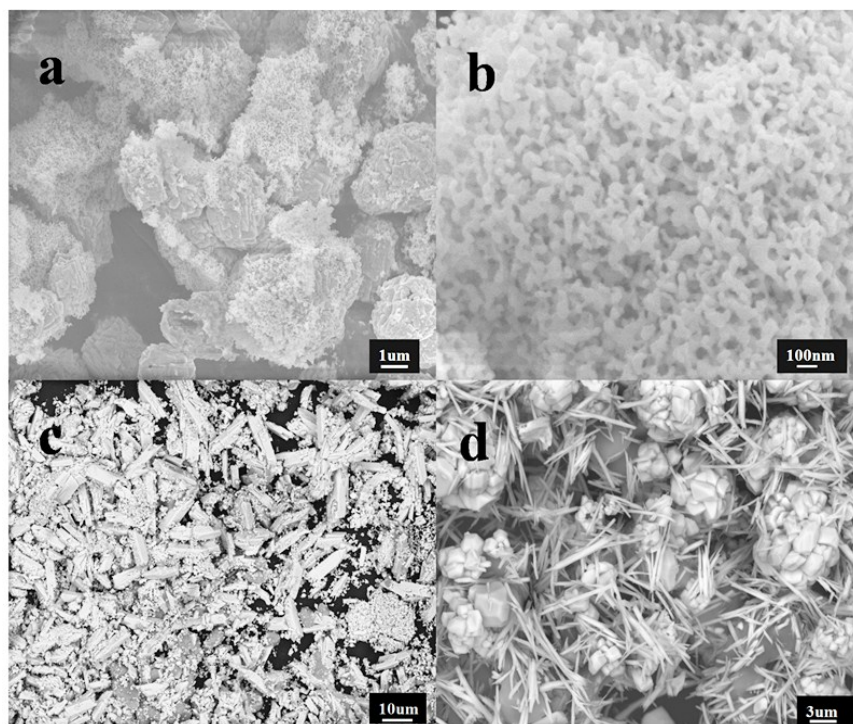

**Fig.S6.** (a), (b) SEM images of the samples before hydrothermal reaction; (c) SEM images of the  $\text{Sb}_2\text{S}_3/\text{Sb}_4\text{O}_5\text{Cl}_2$  prepared in another HCl concentration without adding NaOH; (d) SEM images of the  $\text{Sb}_2\text{S}_3/\text{Sb}_4\text{O}_5\text{Cl}_2$  prepared in the same HCl concentration without adding NaOH.

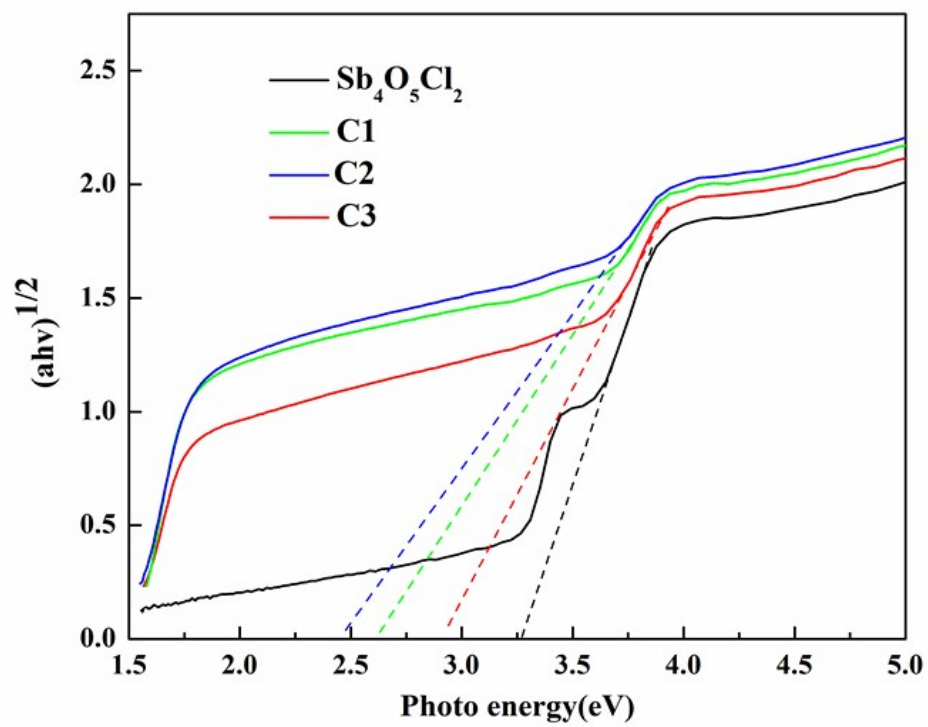

**Fig.S7.** the band gaps ( $E_g$ ) of different samples.

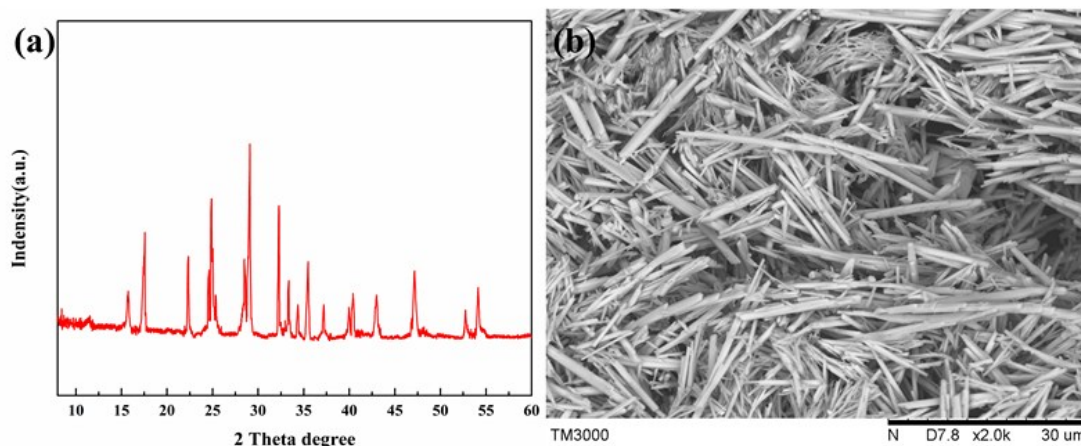

**Fig. S8.** (a) XRD pattern of the as-prepared pure  $\text{Sb}_2\text{S}_3$ , (b) SEM image of the as-prepared pure  $\text{Sb}_2\text{S}_3$ .

**Preparation of pure  $\text{Sb}_2\text{S}_3$ :** 2.282 g  $\text{SbCl}_3$  was dissolved into 20.0 mL  $\text{HCl}$  (6 mol/L) solution to form a homogeneous mixture solution A, 3.6 g of sodium sulfide ( $\text{Na}_2\text{S} \cdot 9\text{H}_2\text{O}$ ) was dissolved in 50.0 ml  $\text{NaOH}$  (2 mol/L) solution to obtain solution B. Subsequently, the mixture solution A was added into the solution B (the method could avoid  $\text{SbCl}_3$  hydrolyzing to produce  $\text{Sb}_4\text{O}_5\text{Cl}_2$ ), and stirring for 30 min at room temperature. Next, the resulting mixture was transferred into 100 mL Teflon-lined steel autoclaves, maintained at 100 °C for 12 h and followed by cooling naturally to room temperature. Finally, the products were filtered, washed several times by water and then dried under vacuum at 60 °C.

The XRD pattern of the as-prepared pure  $\text{Sb}_2\text{S}_3$  is presented in Fig. S8a, All the reflections of  $\text{Sb}_2\text{S}_3$  crystals obtained can be indexed to an orthorhombic phase of  $\text{Sb}_2\text{S}_3$  (JCPDS Files, No.42-1393). Fig. S8b shows the SEM image of the as-prepared pure  $\text{Sb}_2\text{S}_3$ , which reveals a lot of nanorod.

The photocatalytic activity of  $\text{Sb}_2\text{S}_3/\text{Sb}_4\text{O}_5\text{Cl}_2$  and pure  $\text{Sb}_2\text{S}_3$  are carried out by degradation of methyl orange (MO) under visible light irradiation ( $\lambda \geq 400$  nm). As

shown in Fig. S9, the degradation efficiency of the C1, C2, C3 and pure  $\text{Sb}_2\text{S}_3$  are 63.5%, 84.3 %, 54.2% and 23.7 % after 60 min. The results indicate that  $\text{Sb}_2\text{S}_3/\text{Sb}_4\text{O}_5\text{Cl}_2$  composites have higher catalytic activity than pure  $\text{Sb}_2\text{S}_3$  under visible light. The enhanced optical absorption and suitable band gap are considered as significant factors for the improved catalytic activity. As shown in Fig. S10a, with the introduction of  $\text{Sb}_4\text{O}_5\text{Cl}_2$ , the optical absorption was obviously enhanced. The band gap was increased from 1.58eV to 2.45 eV, which was suitable for the improved catalytic activity. Additionally, comparing the morphology of pure  $\text{Sb}_2\text{S}_3$  with  $\text{Sb}_2\text{S}_3/\text{Sb}_4\text{O}_5\text{Cl}_2$  composite, the spherical structure, which is formed on the base of the three-dimensional framework of  $\text{Sb}_4\text{O}_5\text{Cl}_2$ , may be another important factor to affect the photocatalytic performance.

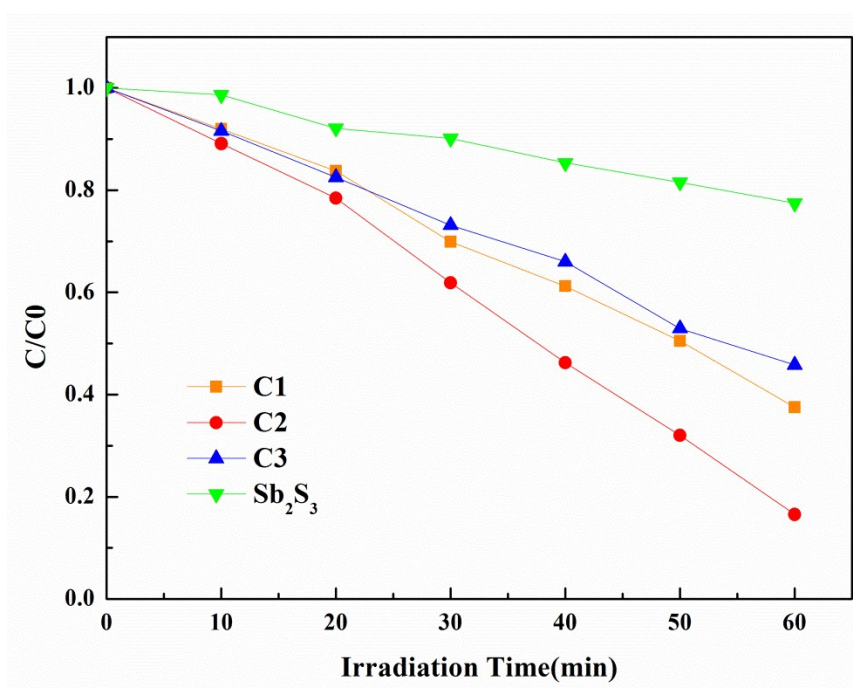

**Fig. S9.** Photocatalytic degradation of MO over different samples under visible light ( $\lambda \geq 420$  nm) irradiation.

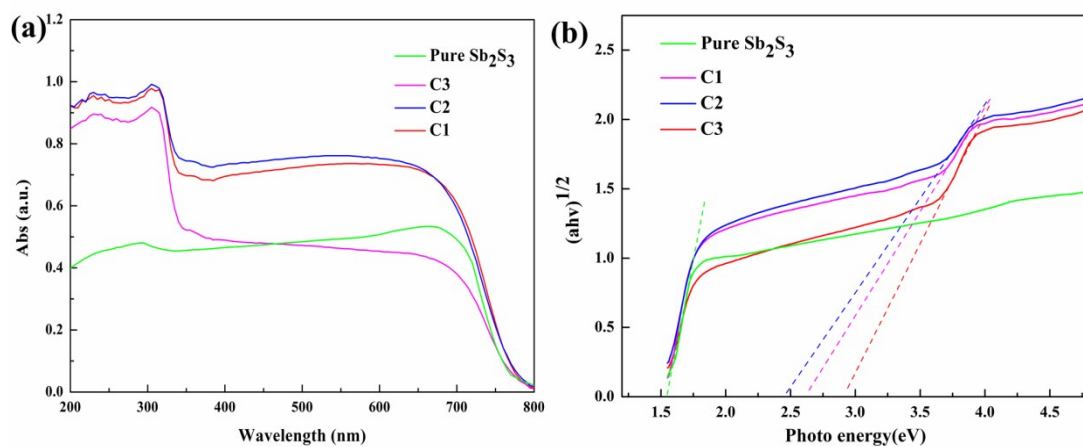

**Fig. S10.** (a) UV-vis diffuse reflectance spectra of different samples; (b) the band gaps ( $E_g$ ) of different samples.
